# Supplementary material for: Geospatiotemporal and Causal Inferential Study of European Epidemiological Patterns of Cannabis- and Substance-Related Congenital Orofacial Anomalies
Source: MDPI journal article supplement (doi:10.3390/jox13010006), 2023-02-01
Supplement: s1 [file s1]

Choanal Atresia

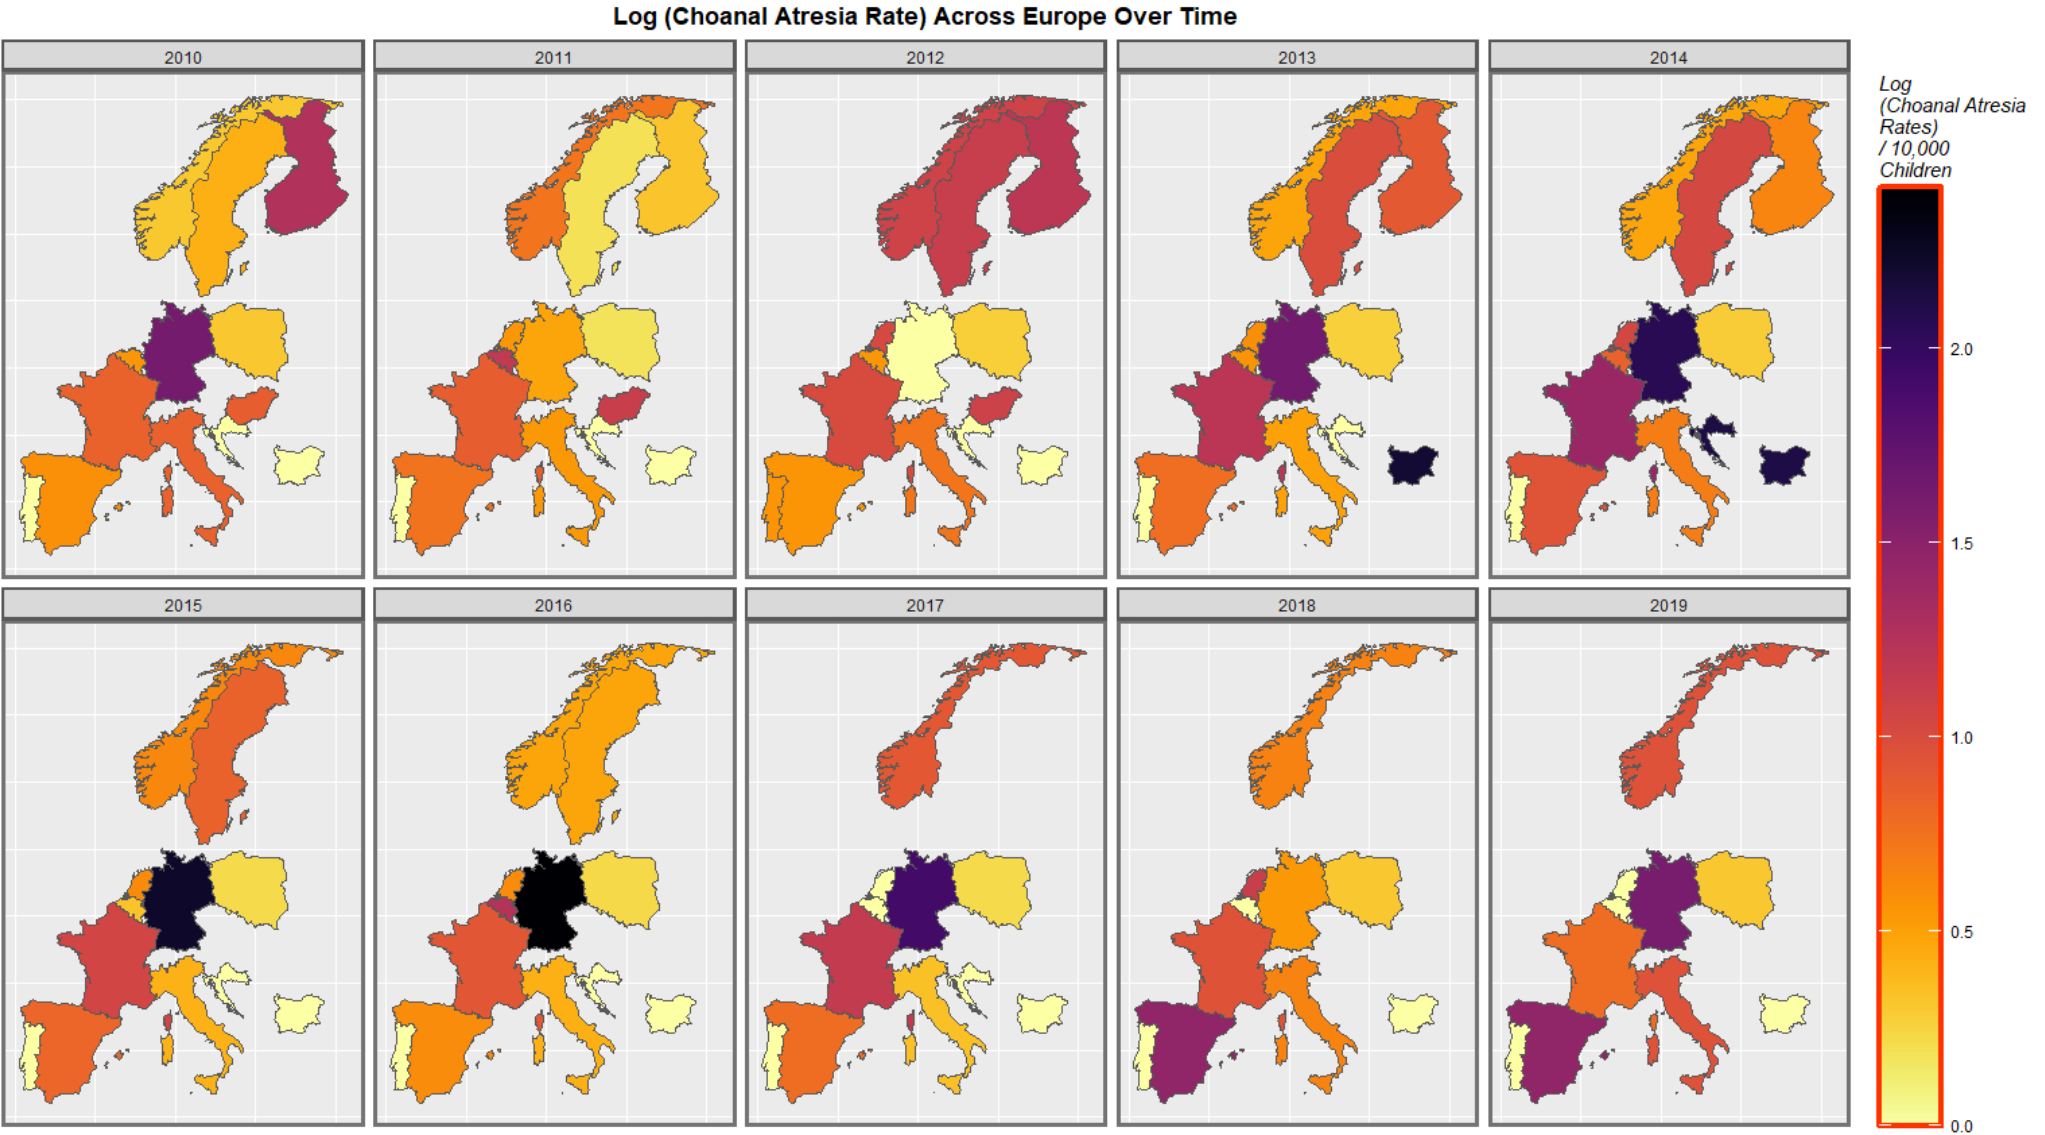

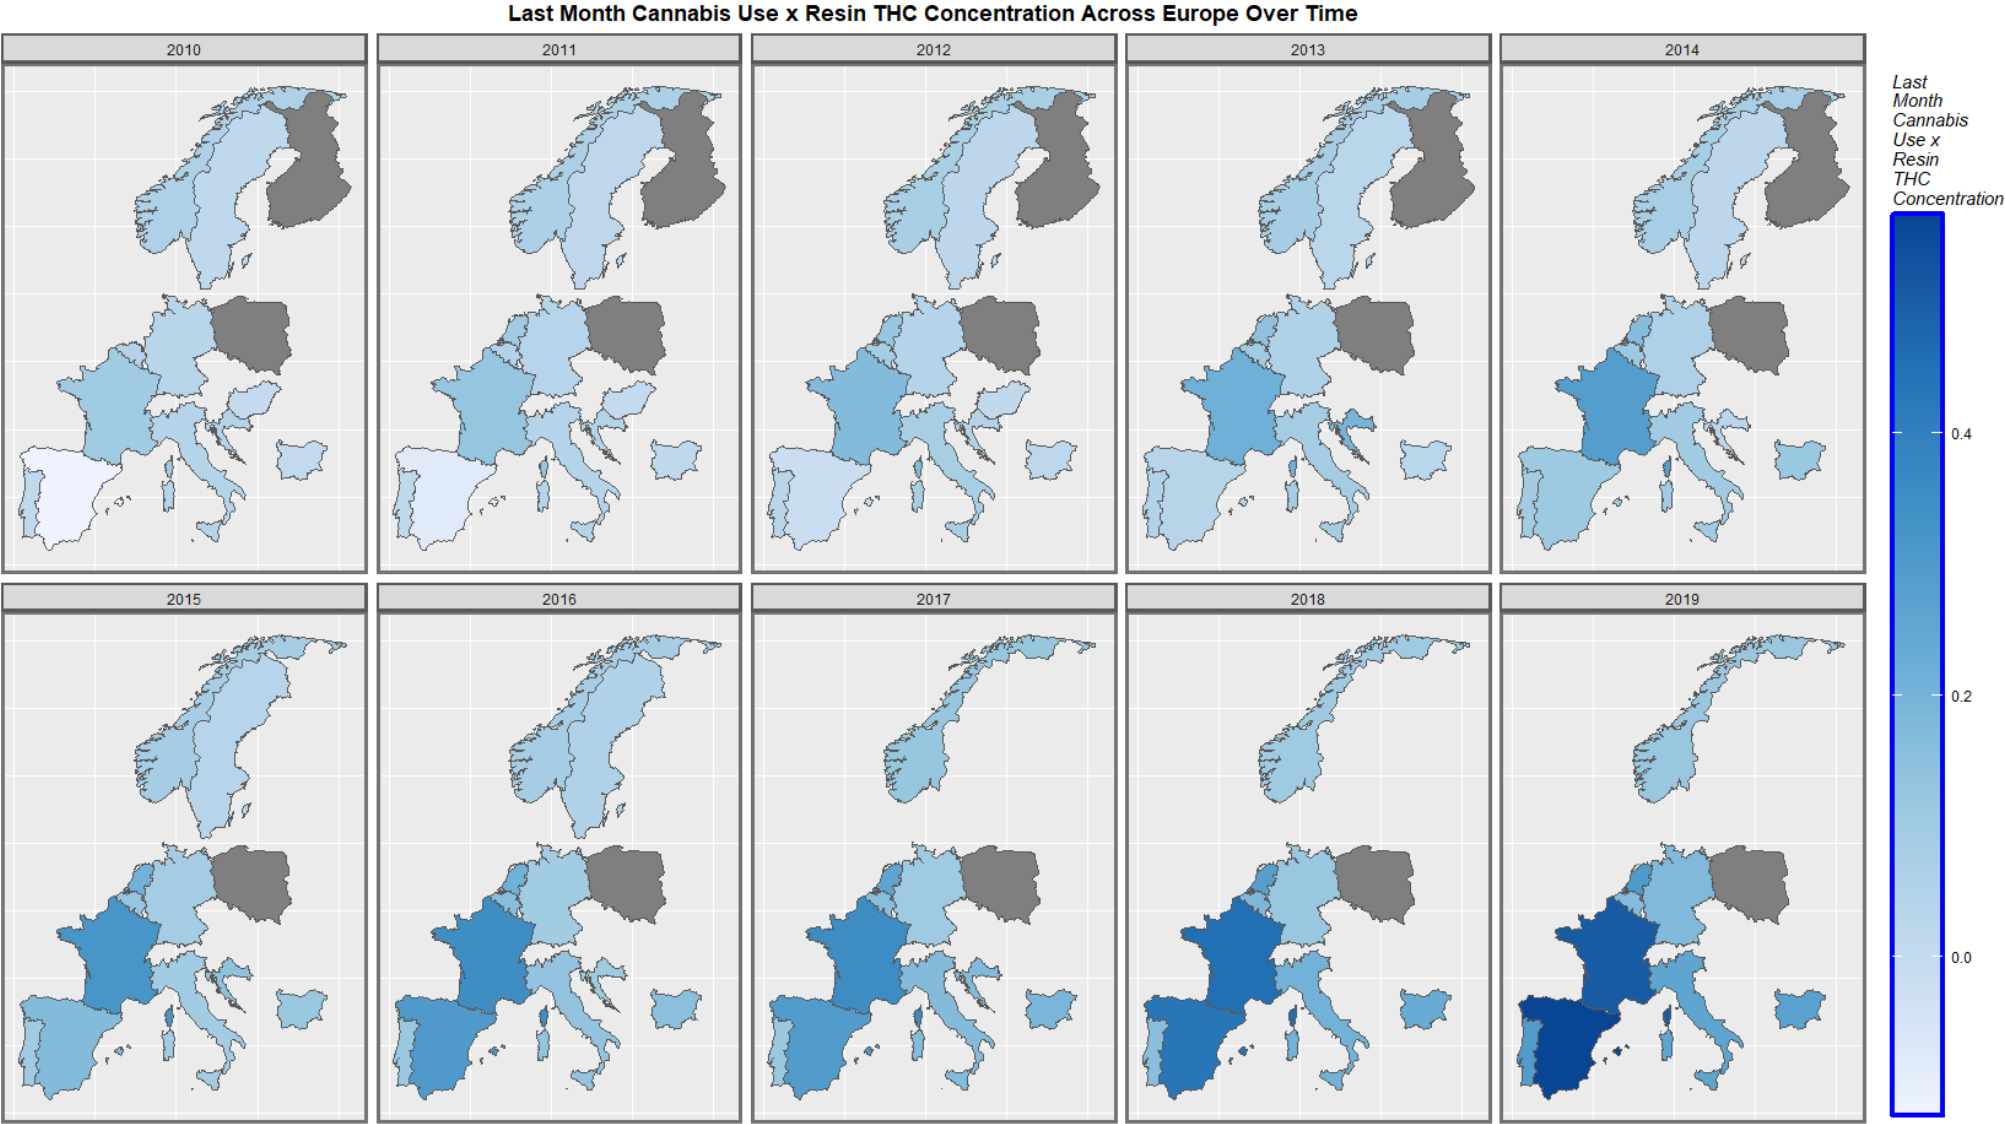

SF3

# Choanal Atresia ~ Herb Bivariate

Log (Choanal Atresia Rate) by Herb THC Concentration Across Europe  
Bivariate Choropleth Colorplane Map

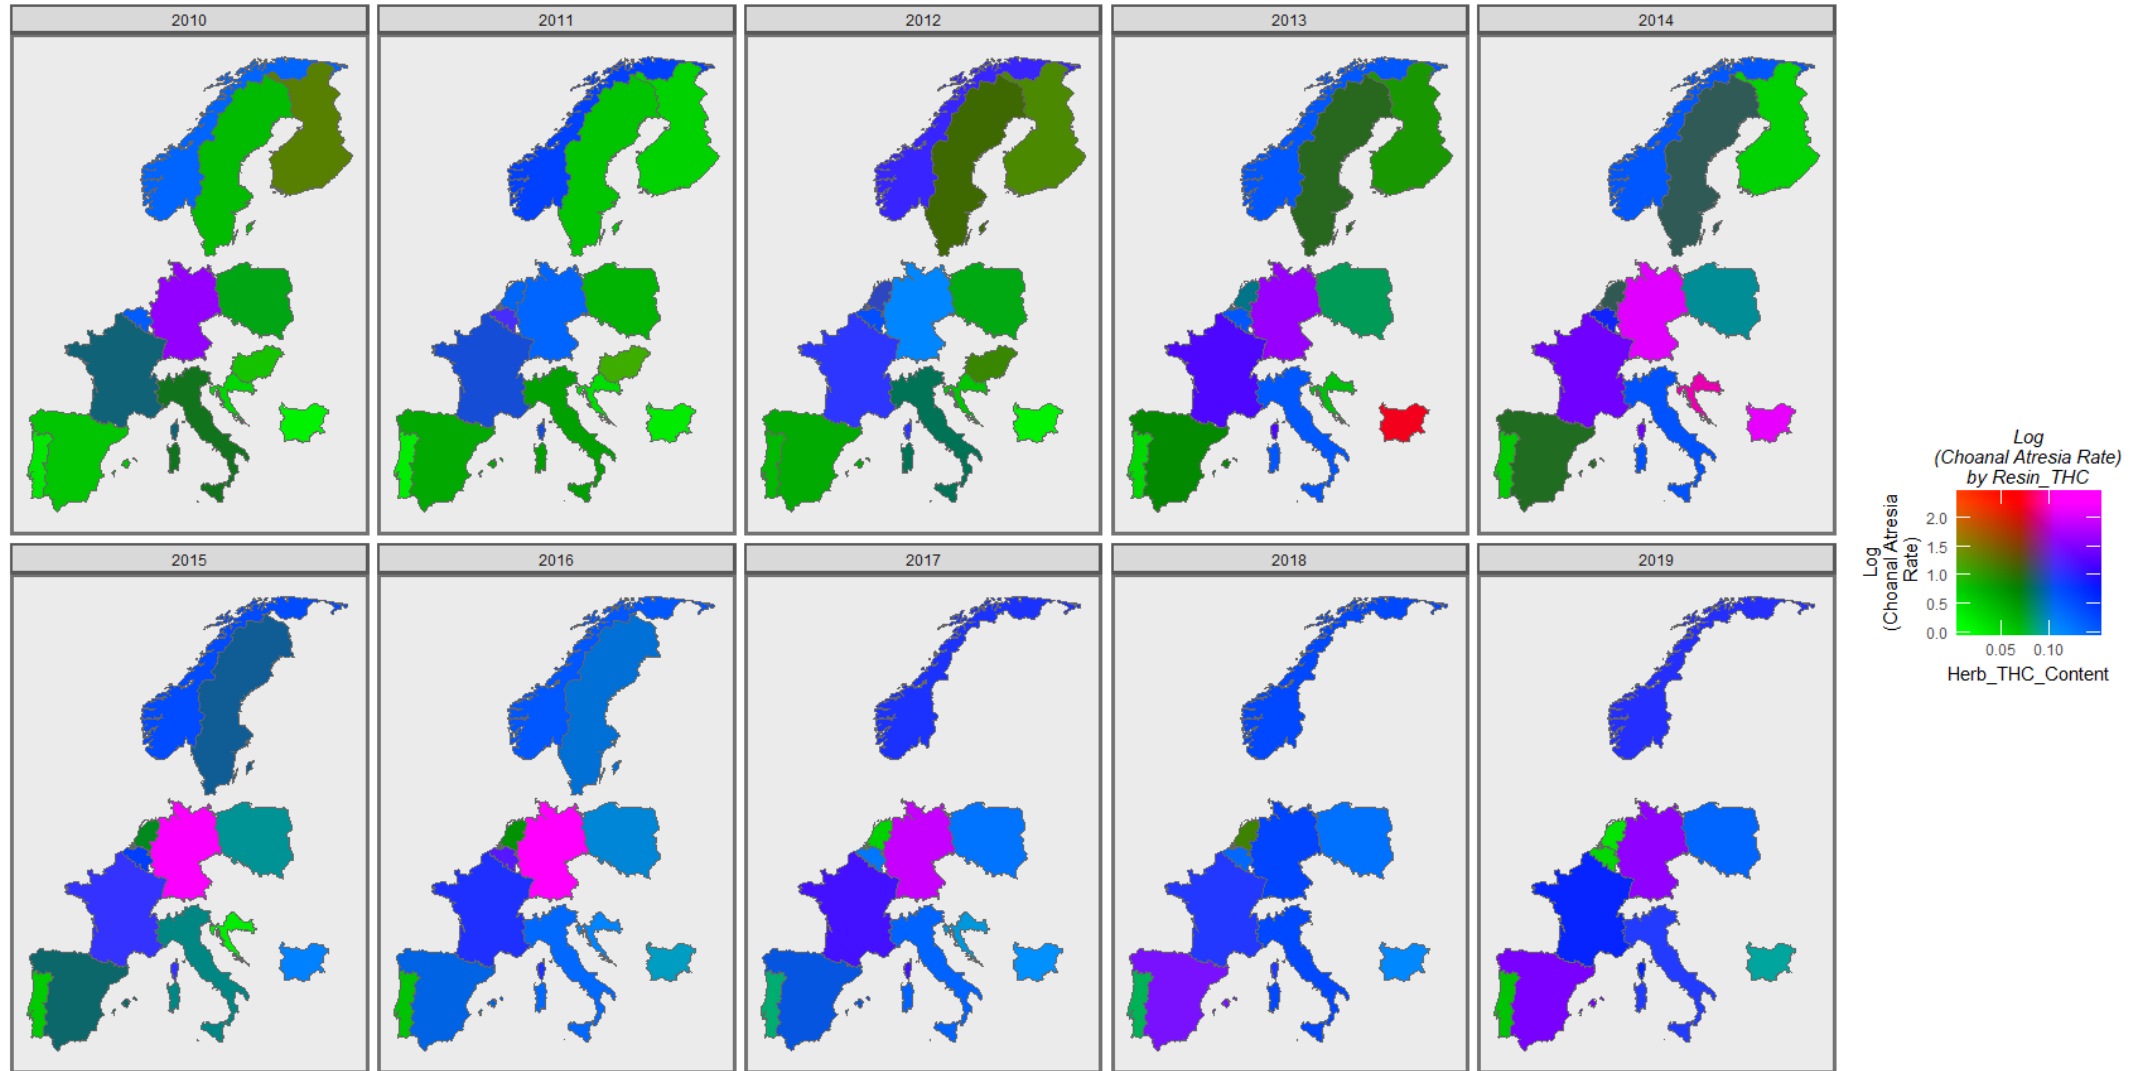

Edited (Red) Links (Blue) to European Country  
Neighbourhood Links for General Anomalies Dataset

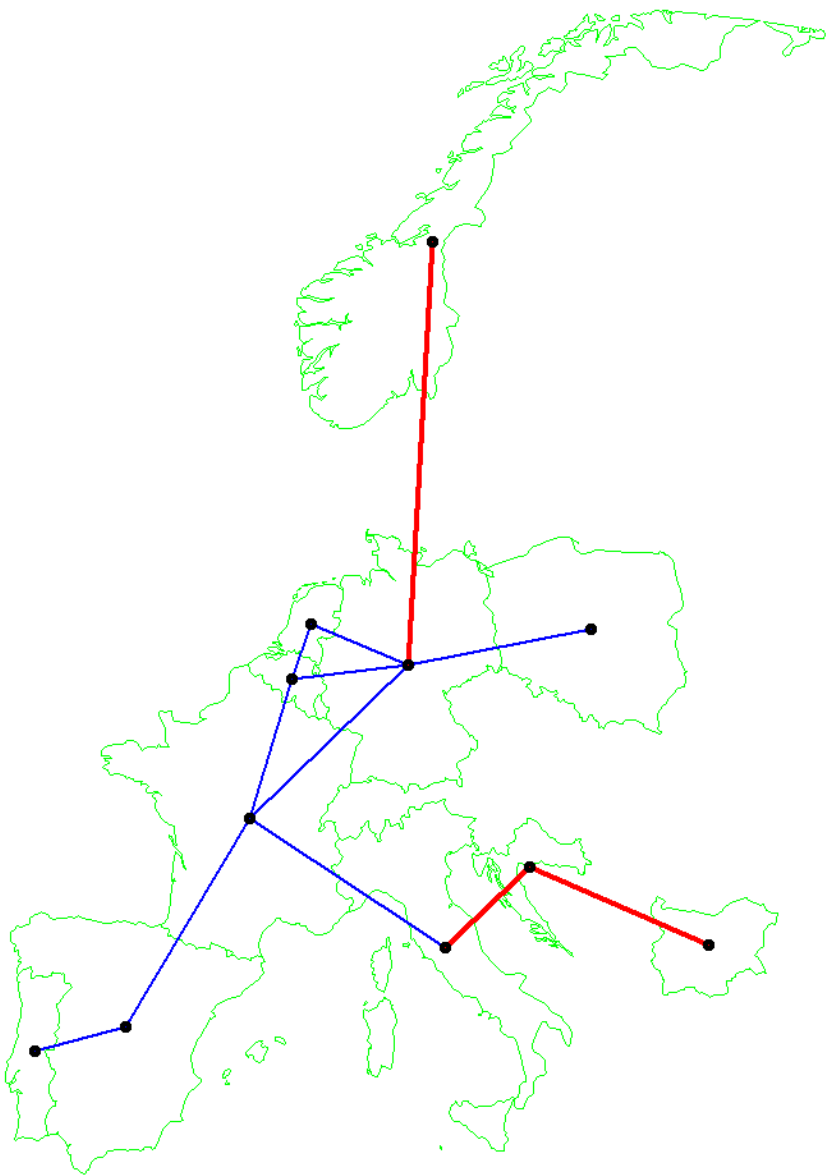

Final Country Neighbourhood Links for  
European General Anomalies Dataset

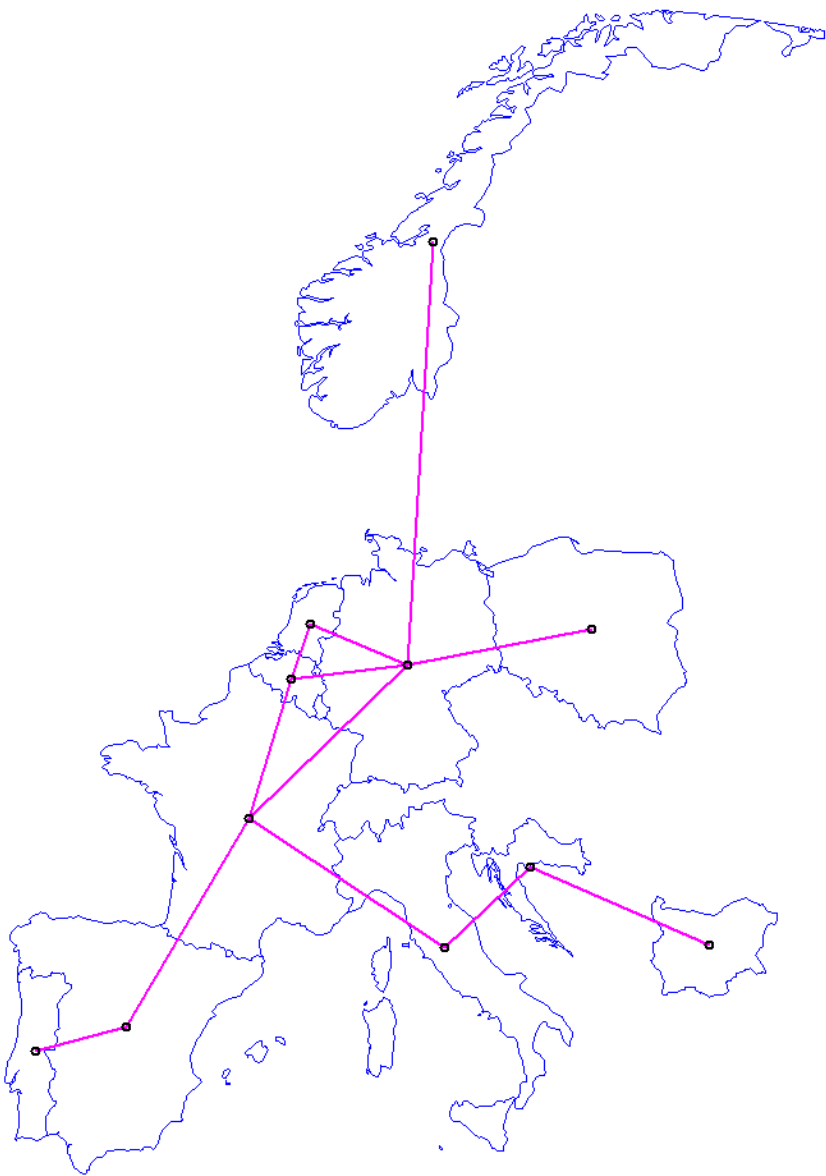

## Supplementary Figure Captions

Figure S1: Sequential map-graphs of log (choanal atresia rates) across surveyed European nations over time 2010-2019.

Figure S2: Sequential map-graphs of last month cannabis use x cannabis resin THC concentration across surveyed European nations over time 2010-2019.

Figure S3: Bivariate Map of Log Choanal Atresia by Cannabis Herb THC Concentration across European nations over time.

Figure S4: Geospatial linked between european nations (A) edited and (B) final.
