# Supplementary material for: Geospatiotemporal and Causal Inferential Study of European Epidemiological Patterns of Cannabis- and Substance-Related Congenital Orofacial Anomalies
Source: J Xenobiot. 2023 Feb 1;13(1):42–74. doi: 10.3390/jox13010006 (PMC9944119; doi:10.3390/jox13010006)
Supplement: Supplementary file 1 [file jox-13-00006-s001.zip › Model Op Face_2 - Supplementary Tables.xlsx]

## Sheet: Contents
	Supplementary Table Number	Contents
	1	Overall Study Profile
	2	Daily Cannabis Use - Raw Data
	3	Daily Cannabis Use - Interpolated Data
	4	All regression slopes and results from bivariate analyses
	5	Variable Importance Tables from Ranger random forest regression - Anotia
	6	Variable Importance Tables from Ranger random forest regression - Orofacial clefts
	7	Variable Importance Tables from Ranger random forest regression - Congenital cataracts
	8	Variable Importance Tables from Ranger random forest regression - Holoprosencephaly
	9	Inverse probability weighted panel regression results - Anotia
	10	Inverse probability weighted panel regression results - Orofacial clefts
	11	Inverse probability weighted panel regression results - Congenital cataracts
	12	Inverse probability weighted panel regression results - Holoprosencephaly
	13	E-Values by Group

## Sheet: ST1 TableOne
	Variable	Value
	Sample Size	1068
	Country (%)
	Belgium	90 ( 8.4)
	Bulgaria	90 ( 8.4)
	Croatia	72 ( 6.7)
	Finland	35 ( 3.3)
	France	90 ( 8.4)
	Germany	90 ( 8.4)
	Hungary	21 ( 2.0)
	Italy	90 ( 8.4)
	Netherlands	81 ( 7.6)
	Norway	90 ( 8.4)
	Poland	90 ( 8.4)
	Portugal	90 ( 8.4)
	Spain	90 ( 8.4)
	Sweden	49 ( 4.6)
	Year (Range)	2010: 2019
	Anomaly (%)
	Anotia	122 (11.4)
	Arhinencephaly/holoprosencephaly	122 (11.4)
	Choanal atresia	122 (11.4)
	Cleft lip with or without palate	122 (11.4)
	Cleft palate	107 (10.0)
	Congenital cataract	122 (11.4)
	Congenital glaucoma	122 (11.4)
	Ear, face and neck	122 (11.4)
	Oro-facial clefts	107 (10.0)
	Anomaly_Rate (mean (SD))	3.69 (5.27)
	Tobacco (mean (SD))	22.80 (5.47)
	Alcohol (p.c.L/Yr) (mean (SD))	10.77 (1.83)
	Amphetamines (% Use) (median [IQR])	0.60 [0.28, 0.80]
	Cocaine (% Use) (median [IQR])	0.73 [0.42, 1.20]
	Last_Month_Cannabis (% Use) (mean (SD))	0.04 (0.02)
	Cannabis_Herb_THC_Content (%) (mean (SD))	0.09 (0.03)
	Cannabis_Resin_THC_Content (%) (mean (SD))	0.16 (0.09)
	%_Daily_Cannabis_ Use (mean (SD))	0.01 (0.01)
	%_Daily_Cannabis_Use_Interpolated (mean (SD))	0.01 (0.01)
	Last_Month_Cannabis_x_Herb_THC_Content (mean (SD))	0.04 (0.03)
	Last_Month_Cannabis_x_Resin_THC_Content (mean (SD))	0.13 (0.12)
	Last_Month_Cannabis_x_Herb_THC_Content_x_Daily_Use_Interpolated (median [IQR])	0.02 [0.00, 0.06]
	Last_Month_Cannabis_x_Resin_THC_Content_x_Daily_Use_Interpolated (median [IQR])	0.03 [0.01, 0.13]
	Trend_in_Daily_Cannabis_Use = Increasing (%)	783 (73.3)
	Mean_Annual_Household_Income (mean (SD))	30085.74 (17339.56)

## Sheet: ST2 Daily
	Country	2010	2011	2012	2013	2014	2015	2016	2017	2018	2019
	Belgium	-	-	-	0.0054	-	-	-	-	0.0132	-
	Bulgaria	-	-	0.002	-	-	-	0.0016	-	-	-
	Croatia	-	-	0.005	-	-	0.0078	-	-	-	-
	Finland	0.002	-	-	-	0.0031	-	-	-	-	-
	France	0.015	-	-	-	0.0217	-	-	0.0199	-	-
	Germany	-	-	0.006	-	-	0.0067	-	-	0.0084	-
	Hungary	-	-	-	-	-	-	-	-	-	-
	Italy	-	-	0.003	-	0.0094	-	-	0.0108	-	-
	Netherlands	-	0.0146	0.0146	0.0146	0.0146	0.0146	0.0133	0.0126	0.019	0.02
	Norway	0.003	0.003	0.003	0.003	0.0037	0.0044	0.0053	0.0016	0.0068	0.0038
	Poland	0.004	-	0.001	-	0.0018	-	-	-	-	-
	Portugal	-	-	0.005	-	-	-	0.0002	-	-	-
	Spain	-	0.025	-	0.026	-	0.0285	-	0.0372	-	-
	Sweden	-	-	-	-	-	-	-	-	-	-
	Cannabis use rates given as fractions of the total population.

## Sheet: ST3 Daily.Int
	Country	2010	2011	2012	2013	2014	2015	2016	2017	2018	2019
	Belgium	0.0054	0.0054	0.0054	0.0054	0.007	0.0085	0.0101	0.0116	0.0132	0.0132
	Bulgaria	0.002	0.002	0.002	0.0019	0.0018	0.0017	0.0016	0.0016	0.0016	0.0016
	Croatia	0.005	0.005	0.005	0.0059	0.0069	0.0078	0.0092	0.0107	-	-
	Finland	0.002	0.0023	0.0026	0.0028	0.0031	-	-	-	-	-
	France	0.015	0.0167	0.0184	0.02	0.0217	0.0211	0.0205	0.0199	0.0199	0.0199
	Germany	0.006	0.006	0.006	0.0062	0.0065	0.0067	0.0073	0.0078	0.0084	0.0084
	Hungary	0.0007	0.0007	0.0007	-	-	-	-	-	-	-
	Italy	0.003	0.003	0.003	0.0062	0.0094	0.0099	0.0103	0.0108	0.0108	0.0108
	Netherlands	-	0.0146	0.0146	0.0146	0.0146	0.0146	0.0133	0.0126	0.019	0.02
	Norway	0.003	0.003	0.003	0.003	0.0037	0.0044	0.0053	0.0016	0.0068	0.0038
	Poland	0.004	0.0025	0.001	0.0014	0.0018	0.0018	0.0018	0.0018	0.0018	0.0018
	Portugal	0.005	0.005	0.005	0.0038	0.0026	0.0014	0.0002	0.0002	0.0002	0.0002
	Spain	0.025	0.025	0.0255	0.026	0.0273	0.0285	0.0329	0.0372	0.0372	0.0372
	Sweden	-	-	-	-	-	-	-	-	-	-
	Cannabis use rates given as fractions of the total population.

## Sheet: ST4 BivSlopes
	Anomaly	Substance	Mean Anomaly Rate	Estimate	Std.Error	Sigma	t_statistic	P_Value	E-Value Estimate	E-Value Lower Bound
	Cong. Glaucoma	Daily.Interpol.	0.2807	14.6074	3.1705	0.2976	4.6073	1.08e-05	5.01e+19	2.91003e+11
	Cong. Cataract	Daily.Interpol.	1.2577	28.5308	7.0169	0.6586	4.066	8.88e-05	2.63444e+17	1.53062e+09
	Holoprosencephaly ~	Daily.Interpol.	1.4692	21.5235	7.3229	0.6874	2.9392	0.00399049	4.74712e+12	27580.5
	Cong. Glaucoma	LM_Cannabis	0.2807	5.1764	1.2223	0.2958	4.235	4.5e-05	1.64646e+07	10530.1
	Cong. Glaucoma	LMCannabis_Herb	0.2807	4.6092	1.0216	0.2933	4.5116	1.51e-05	3.25488e+06	6598.55
	Choanal Atresia	Daily.Interpol.	0.8651	16.4363	6.1304	0.5754	2.6811	0.00843635	3.88827e+11	2258.6
	Oro-facial clefts	Herb	13.8647	5.5992	1.4086	0.4665	3.9751	0.000129	110832	512.89
	Cong. Glaucoma	LM.Cannabis_x_Herb.THC: LM.Cannabis_x_Resin.THC_x_Daily.Interpol.	0.2807	1.8797	0.3363	0.2871	5.5899	1.6e-07	773.448	95.7075
	Holoprosencephaly ~	LMCannabis_Herb	1.4692	7.2896	2.3517	0.6751	3.0996	0.0024144	37031.3	74.5761
	Cleft lip +/- palate	Herb	8.6394	4.831	1.4738	0.5731	3.2779	0.00136837	4291.39	43.6045
	Choanal Atresia	Herb	0.8651	4.6769	1.4339	0.5575	3.2618	0.00144181	4132.48	41.971
	Choanal Atresia	LMCannabis_Herb	0.8651	5.6312	1.9603	0.5627	2.8727	0.00481424	18033.8	36.0563
	Cong. Cataract	LM.Cannabis_x_Herb.THC_x_Daily.Interpol.	1.2577	3.0504	0.7745	0.6612	3.9383	0.000142	132.595	16.0293
	Cong. Glaucoma	LM.Cannabis_x_Resin.THC_x_Daily.Interpol.	0.2807	0.7827	0.148	0.2769	5.2888	7.49e-07	25.6725	9.58593
	Cong. Cataract	LMCannabis_Herb	1.2577	5.8011	2.3691	0.68	2.4487	0.0157835	4702.15	9.00492
	Cong. Glaucoma	LMCannabis_Resin	0.2807	0.9308	0.239	0.2862	3.8938	0.000174	38.0568	8.18877
	Holoprosencephaly ~	LM_Cannabis	1.4692	6.4729	2.8379	0.6868	2.2808	0.0243221	10604.1	6.23906
	Cong. Cataract	LM.Cannabis_x_Resin.THC_x_Daily.Interpol.	1.2577	1.4541	0.3289	0.6155	4.421	2.54e-05	16.6531	6.08693
	Choanal Atresia	LM.Cannabis_x_Herb.THC_x_Daily.Interpol.	0.8651	2.0059	0.669	0.5712	2.9983	0.00333879	48.3626	5.52505
	Cleft lip +/- palate	Resin	8.6394	1.9931	0.6734	0.6054	2.9596	0.00380766	39.5048	4.96777
	Holoprosencephaly ~	LM.Cannabis_x_Herb.THC_x_Daily.Interpol.	1.4692	2.2977	0.8069	0.6889	2.8476	0.00523418	41.1077	4.61226
	Cleft palate	Herb	5.4067	4.5693	1.9872	0.6581	2.2993	0.0234646	1108.47	4.57558
	Holoprosencephaly ~	LMCannabis_Resin	1.4692	1.7077	0.5689	0.6812	3.0017	0.00335525	19.0631	3.85276
	Cong. Cataract	LMCannabis_Resin	1.2577	1.6027	0.5343	0.6398	2.9994	0.00337852	19.029	3.84489
	Oro-facial clefts	Resin	13.8647	1.51	0.5861	0.5046	2.5763	0.0115269	29.9467	3.26208
	Cong. Cataract	LM_Cannabis	1.2577	5.9992	2.8266	0.6841	2.1224	0.0358606	5844.18	3.14363
	Holoprosencephaly ~	Herb	1.4692	3.8304	1.7701	0.6883	2.164	0.0324488	316.065	2.63652
	Holoprosencephaly ~	LM.Cannabis_x_Resin.THC_x_Daily.Interpol.	1.4692	1.0633	0.3702	0.6927	2.8724	0.00499365	7.54947	2.49781
	Cleft lip +/- palate	Log(Amphetamine)	8.6394	0.3116	0.0694	0.5535	4.4886	1.66e-05	2.72561	2.00394
	Oro-facial clefts	Log(Amphetamine)	13.8647	0.2437	0.0601	0.4653	4.0522	9.75e-05	2.60248	1.87782
	Cong. Cataract	Cocaine	1.2577	0.2832	0.0828	0.6652	3.4197	0.000857	2.30827	1.64182
	Holoprosencephaly ~	Cocaine	1.4692	0.2711	0.0838	0.6728	3.2355	0.00156954	2.24217	1.58067
	Holoprosencephaly ~	Resin	1.4692	1.6126	0.7738	0.6956	2.0839	0.0396008	15.9719	1.53461
	Choanal Atresia	Cocaine	0.8651	0.2113	0.0698	0.5607	3.0258	0.00303505	2.16803	1.51026
	Choanal Atresia	LM.Cannabis_x_Resin.THC_x_Daily.Interpol.	0.8651	0.6931	0.3224	0.6033	2.1496	0.0340481	5.13487	1.42801
	Cong. Glaucoma	Cocaine	0.2807	0.0987	0.0384	0.3088	2.5683	0.0114476	2.00998	1.34931
	Cleft lip +/- palate	Cocaine	8.6394	0.1619	0.073	0.5863	2.2183	0.0284193	1.89191	1.20641
	Ear, face and neck	Log(Amphetamine)	2.6052	0.2087	0.0951	0.7583	2.195	0.0300918	1.88933	1.19617
	Ear, face and neck	Annual_Alcohol	2.6052	0.0779	0.0378	0.76	2.0616	0.0414021	1.42549	1.07417
	Cleft palate	Annual_Alcohol	5.4067	0.0008	0.0347	0.6745	0.0225	0.982084	1.03357	1
	Holoprosencephaly ~	Tobacco	1.4692	0.0024	0.0117	0.7015	0.2029	0.839519	1.05864	1
	Cong. Glaucoma	Annual_Alcohol	0.2807	0.0163	0.0157	0.3157	1.0364	0.302101	1.27238	1
	Ear, face and neck	Herb	2.6052	0.0605	1.9888	0.7733	0.0304	0.9758	1.35511	1
	Anotia	Annual_Alcohol	0.2498	0.0214	0.0126	0.2539	1.6934	0.0929652	1.37294	1
	Holoprosencephaly ~	Annual_Alcohol	1.4692	0.0585	0.0345	0.6933	1.6949	0.0926869	1.37316	1
	Choanal Atresia	Annual_Alcohol	0.8651	0.049	0.0286	0.5747	1.7141	0.0890974	1.37594	1
	Cleft palate	Log(Amphetamine)	5.4067	0.0965	0.0867	0.6705	1.1134	0.268092	1.53932	1
	Ear, face and neck	Cocaine	2.6052	0.1157	0.0957	0.7687	1.209	0.229051	1.55714	1
	Choanal Atresia	Log(Amphetamine)	0.8651	0.0903	0.0725	0.578	1.2458	0.215267	1.57241	1
	Cleft palate	Cocaine	5.4067	0.1087	0.0898	0.6698	1.2098	0.229076	1.58847	1
	Ear, face and neck	Resin	2.6052	0.1216	0.8152	0.7328	0.1492	0.881668	1.59854	1
	Oro-facial clefts	LMCannabis_Resin	13.8647	0.1067	0.4565	0.5218	0.2337	0.815697	1.70089	1
	Cleft palate	LM.Cannabis_x_Resin.THC_x_Daily.Interpol.	5.4067	0.1578	0.3802	0.7078	0.4151	0.678993	1.74993	1
	Cleft palate	LM.Cannabis_x_Herb.THC_x_Daily.Interpol.	5.4067	0.1588	0.8008	0.6744	0.1984	0.843153	1.78327	1
	Oro-facial clefts	Cocaine	13.8647	0.1218	0.066	0.4924	1.8446	0.0679217	1.81469	1
	Oro-facial clefts	LMCannabis_Herb	13.8647	0.1367	1.9325	0.5003	0.0707	0.943752	1.88373	1
	Cong. Cataract	Herb	1.2577	0.2455	1.7919	0.6968	0.137	0.891256	2.09974	1
	Choanal Atresia	LMCannabis_Resin	0.8651	0.3356	0.5023	0.6015	0.6682	0.505464	2.71023	1
	Cong. Glaucoma	Herb	0.2807	0.2178	0.8154	0.3171	0.2671	0.789829	3.14252	1
	Cleft palate	LMCannabis_Resin	5.4067	0.6277	0.6165	0.7046	1.0183	0.311143	3.92605	1
	Anotia	LMCannabis_Herb	0.2498	0.246	0.8949	0.2569	0.2749	0.783894	4.213	1
	Cong. Cataract	Resin	1.2577	0.914	0.7362	0.6618	1.2415	0.217205	6.48602	1
	Cleft palate	LM_Cannabis	5.4067	1.0536	3.1412	0.6741	0.3354	0.737993	7.75792	1
	Cleft palate	Resin	5.4067	1.2616	0.8126	0.6996	1.5525	0.123879	9.79291	1
	Anotia	Herb	0.2498	0.9792	0.6548	0.2546	1.4956	0.137391	65.7357	1
	Cleft palate	LMCannabis_Herb	5.4067	2.9074	2.5897	0.6705	1.1227	0.264128	102.958	1
	Choanal Atresia	LM_Cannabis	0.8651	2.5672	2.3921	0.5789	1.0732	0.285336	112.606	1
	Cleft palate	Daily.Interpol.	5.4067	4.1574	7.363	0.6735	0.5646	0.573521	549.951	1
	Ear, face and neck	Daily.Interpol.	2.6052	6.5204	8.4186	0.7902	0.7745	0.440237	3648.15	1
	Choanal Atresia	Tobacco	0.8651	-0.0028	0.0097	0.5815	-0.2928	0.77017	1.07125	NA
	Oro-facial clefts	Tobacco	13.8647	-0.0026	0.0087	0.5001	-0.3048	0.76111	1.07444	NA
	Cong. Glaucoma	Resin	0.2807	-0.0023	0.0053	0.3169	-0.4412	0.659837	1.08884	NA
	Oro-facial clefts	Annual_Alcohol	13.8647	-0.0059	0.0258	0.5002	-0.2282	0.819938	1.11502	NA
	Cong. Cataract	Annual_Alcohol	1.2577	-0.0117	0.0346	0.6965	-0.3364	0.737126	1.14017	NA
	Cleft lip +/- palate	LMCannabis_Resin	8.6394	-0.0114	0.5262	0.6301	-0.0216	0.982775	1.14642	NA
	Anotia	Daily.Interpol.	0.2498	-0.0053	0.0042	0.2553	-1.2465	0.215007	1.15838	NA
	Cleft lip +/- palate	Tobacco	8.6394	-0.0136	0.0099	0.5935	-1.3736	0.172119	1.16749	NA
	Ear, face and neck	Tobacco	2.6052	-0.0189	0.0127	0.7663	-1.4831	0.140667	1.1751	NA
	Cleft palate	Tobacco	5.4067	-0.0203	0.0115	0.6647	-1.7639	0.0806615	1.19863	NA
	Cong. Glaucoma	Resin	0.2807	-0.0099	0.3406	0.3062	-0.029	0.976935	1.20486	NA
	Cong. Cataract	Tobacco	1.2577	-0.0271	0.0113	0.6808	-2.3903	0.0183881	1.23232	NA
	Holoprosencephaly ~	Log(Amphetamine)	1.4692	-0.0355	0.0879	0.7011	-0.4043	0.686744	1.26956	NA
	Cleft lip +/- palate	Annual_Alcohol	8.6394	-0.0315	0.0296	0.5954	-1.0642	0.289367	1.27691	NA
	Anotia	Cocaine	0.2498	-0.0147	0.032	0.2567	-0.4597	0.646599	1.29078	NA
	Cong. Cataract	Log(Amphetamine)	1.2577	-0.0471	0.0873	0.696	-0.5393	0.59066	1.3233	NA
	Anotia	LM.Cannabis_x_Resin.THC_x_Daily.Interpol.	0.2498	-0.0261	0.1425	0.2667	-0.1831	0.855064	1.41225	NA
	Anotia	Log(Amphetamine)	0.2498	-0.0413	0.032	0.2552	-1.2899	0.199581	1.5872	NA
	Cong. Glaucoma	Log(Amphetamine)	0.2807	-0.0705	0.0392	0.313	-1.7974	0.0747902	1.75632	NA
	Cleft lip +/- palate	LM.Cannabis_x_Resin.THC_x_Daily.Interpol.	8.6394	-0.1545	0.3435	0.6427	-0.4499	0.65378	1.79626	NA
	Anotia	LM.Cannabis_x_Herb.THC_x_Daily.Interpol.	0.2498	-0.0686	0.3044	0.2599	-0.2254	0.822099	1.85913	NA
	Oro-facial clefts	LM.Cannabis_x_Resin.THC_x_Daily.Interpol.	13.8647	-0.1667	0.2799	0.521	-0.5956	0.552891	2.01032	NA
	Choanal Atresia	Resin	0.8651	-0.3188	0.6698	0.6021	-0.4759	0.635114	2.61999	NA
	Anotia	LMCannabis_Resin	0.2498	-0.1423	0.2193	0.2626	-0.649	0.517734	2.65948	NA
	Ear, face and neck	LM.Cannabis_x_Resin.THC_x_Daily.Interpol.	2.6052	-0.4905	0.3995	0.7477	-1.2278	0.222478	3.03491	NA
	Anotia	Resin	0.2498	-0.175	0.2922	0.2627	-0.5988	0.550601	3.06945	NA
	Ear, face and neck	LM.Cannabis_x_Herb.THC_x_Daily.Interpol.	2.6052	-0.6154	0.9262	0.7907	-0.6644	0.507776	3.47673	NA
	Ear, face and neck	LMCannabis_Resin	2.6052	-0.7395	0.6078	0.7278	-1.2167	0.22646	4.47904	NA
	Oro-facial clefts	LM.Cannabis_x_Herb.THC_x_Daily.Interpol.	13.8647	-0.6477	0.5908	0.4975	-1.0963	0.275466	5.99346	NA
	Cleft lip +/- palate	LM.Cannabis_x_Herb.THC_x_Daily.Interpol.	8.6394	-0.9214	0.707	0.6036	-1.3032	0.195149	7.48682	NA
	Cleft lip +/- palate	LMCannabis_Herb	8.6394	-1.5013	2.0794	0.5969	-0.722	0.471685	19.2154	NA
	Ear, face and neck	LMCannabis_Herb	2.6052	-2.2562	2.6861	0.7711	-0.84	0.402603	28.1639	NA
	Ear, face and neck	LM_Cannabis	2.6052	-2.5875	3.1865	0.7712	-0.812	0.418398	41.8564	NA
	Anotia	Daily.Interpol.	0.2498	-1.5363	2.7659	0.2596	-0.5554	0.579695	435.676	NA
	Anotia	LM_Cannabis	0.2498	-1.5531	1.0522	0.2547	-1.4761	0.142544	513.97	NA
	Oro-facial clefts	Daily.Interpol.	13.8647	-3.0558	5.4622	0.4996	-0.5594	0.577057	522.151	NA
	Oro-facial clefts	LM_Cannabis	13.8647	-3.9227	2.2998	0.4936	-1.7056	0.0910343	2766.4	NA
	Cleft lip +/- palate	Daily.Interpol.	8.6394	-5.7649	6.4563	0.606	-0.8929	0.373801	11496.7	NA
	Cleft lip +/- palate	LM_Cannabis	8.6394	-6.4564	2.4003	0.5809	-2.6898	0.00816724	49358.8	NA

## Sheet: ST5-8 Ranger Op
	Anotia			Orofacial Clefts
	Random Forrest Regression Table			Random Forrest Regression Table
	Variable	Importance		Variable	Importance
	Tobacco	0.898288		Income	7.58852
	Alcohol	0.869568		Amphetamines	4.99458
	Herb	0.773232		Tobacco	4.13439
	Income	0.651341		Cocaine	3.77856
	Daily.Interpol.	0.51814		Daily.Interpol.	3.67778
	Resin	0.488896		Herb	3.0122
	LM.Cannabis	0.468139		LM.Cannabis_x_Herb.THC_x_Daily.Interpol.	2.19919
	LM.Cannabis_x_Resin.THC	0.463148		LM.Cannabis	2.18721
	LM.Cannabis_x_Herb.THC	0.4444		LM.Cannabis_x_Resin.THC_x_Daily.Interpol.	2.04586
	Amphetamines	0.433297		LM.Cannabis_x_Resin.THC	1.82216
	LM.Cannabis_x_Resin.THC_x_Daily.Interpol.	0.426023		Alcohol	1.81892
	LM.Cannabis_x_Herb.THC_x_Daily.Interpol.	0.388313		Resin	1.64747
	Daily.Interpol.	0.353168		LM.Cannabis_x_Herb.THC	1.51354
	Congenital Cataracts			Holoprosencephaly
	Random Forrest Regression Table			Random Forrest Regression Table
	Variable	Importance		Variable	Importance
	Income	9.3889		Income	9.38884
	Tobacco	6.48426		Tobacco	8.31953
	LM.Cannabis_x_Resin.THC	4.67095		Alcohol	4.94065
	LM.Cannabis_x_Resin.THC_x_Daily.Interpol.	4.46273		LM.Cannabis_x_Resin.THC_x_Daily.Interpol.	4.66629
	LM.Cannabis_x_Herb.THC_x_Daily.Interpol.	4.34702		LM.Cannabis_x_Resin.THC	3.84144
	Herb	4.3229		Herb	3.66711
	Daily.Interpol.	4.08456		Resin	3.56926
	Resin	3.49214		LM.Cannabis_x_Herb.THC_x_Daily.Interpol.	3.47909
	Cocaine	2.9632		Daily.Interpol.	3.35466
	LM.Cannabis	2.84059		Cocaine	2.97794
	Amphetamines	2.81422		LM.Cannabis	2.51468
	LM.Cannabis_x_Herb.THC	2.72667		LM.Cannabis_x_Herb.THC: LM.Cannabis_x_Resin.THC_x_Daily.Interpol.	2.12728
	Alcohol	2.66729		Amphetamines	2.0902

## Sheet: ST9 Clft plm
	Parameters			Model Parameters
	Term	Estimate (C.I.)	P-Value	Parameter	Value
	Additive
	Rate ~ Tobacco + Daily.Interpol. + Herb + LM.Cannabis + LM.Cannabis_x_Herb.THC_x_Daily.Interpol. + Alcohol + Amphetamines + Cocaine + Income
	Tobacco	0.06 (0.02, 0.11)	0.0085	Adj.R.Squared	0.0869	**
	Herb	4.38 (1.73, 7.03)	0.0016	Statistic	12.5813	**
	Alcohol	-0.12 (-0.22, -0.03)	0.0088	Deg.Freedom	5116	**
	Cocaine	-0.28 (-0.4, -0.15)	4.23e-05	P-Value	9.14e-10	***
	Income	0 (0, 0)	0.0028			**
	Interactive
	Rate ~ Tobacco * Daily.Interpol. + Herb + LM.Cannabis + LM.Cannabis_x_Herb.THC_x_Daily.Interpol. + Alcohol + Amphetamines + Cocaine + Income
	Daily.Interpol.	13.22 (0.64, 25.8)	0.0416	Adj.R.Squared	-0.01214	*
	Alcohol	-0.18 (-0.25, -0.11)	7.77e-07	Statistic	14.0839	***
	Amphetamines	0.35 (0.14, 0.56)	0.0017	Deg.Freedom	4117	**
	Cocaine	-0.45 (-0.69, -0.21)	0.0003	P-Value	2.07e-09	***
	2 Lags
	Rate ~ Tobacco * Herb + Daily.Interpol. + LM.Cannabis + Alcohol + LM.Cannabis_x_Herb.THC_x_Daily.Interpol. + Amphetamines + Cocaine + Income
	Herb	-9.27 (-16.33, -2.21)	0.0117	Adj.R.Squared	0.0506	*
	Daily.Interpol.	-49.82 (-68.32, -31.32)	9.25e-07	Statistic	18.9986	***
	Alcohol	-0.19 (-0.29, -0.1)	0.0001	Deg.Freedom	5,88	***
	Cocaine	0.56 (0.26, 0.86)	0.0004	P-Value	9.04e-13	***
	Tobacco: Herb	0.75 (0.42, 1.08)	2.65e-05			***
		LAnomRt ~ lag(TobRt,2) * lag(Herb,2) + lag(pm.Daily.Intpltd,2) + lag(pm,2) + lag(AlcRt,2) + lag(LpmHerbDailyInt,2) + lag(LAmph,2) + lag(LCocc,2) + lag(MHY,2)

## Sheet: ST10 Anot plm
	Parameters			Model Parameters
	Term	Estimate (C.I.)	P-Value	Parameter	Value
	Additive
	Rate ~ Tobacco + LM.Cannabis_x_Resin.THC + Alcohol + Resin + LM.Cannabis_x_Herb.THC + LM.Cannabis + Amphetamines + Cocaine + Income
	LM.Cannabis_x_Resin.THC	-1.3 (-1.7, -0.9)	3.67e-09	Adj.R.Squared	0.09832	***
	LM.Cannabis_x_Herb.THC	7.4 (5.05, 9.75)	1.04e-08	Statistic	17	***
	Cocaine	-0.18 (-0.23, -0.13)	3.8e-10	Deg.Freedom	4,117	***
	Income	0 (0, 0)	3.19e-07	P-Value	4.21e-11	***
	Interactive
	Rate ~ Tobacco * LM.Cannabis_x_Resin.THC * LM.Cannabis_x_Herb.THC + Resin + LM.Cannabis + Alcohol + Amphetamines + Cocaine + Income
	LM.Cannabis_x_Herb.THC	7.22 (4.83, 9.61)	2.99e-08	Adj.R.Squared	0.06146	***
	Cocaine	-0.18 (-0.23, -0.12)	9.44e-10	Statistic	16.3033	***
	Income	0 (0, 0)	7.26e-05	Deg.Freedom	4117	***
	Tobacco: LM.Cannabis_x_Resin.THC	-0.05 (-0.07, -0.04)	1.13e-08	P-Value	1.21e-10	***
	1 Lag
	Rate ~ Tobacco * LM.Cannabis_x_Resin.THC + LM.Cannabis_x_Herb.THC + Resin + Alcohol + Daily.Interpol. + Amphetamines + Cocaine + Income
	LM.Cannabis_x_Herb.THC	1.46 (0.38, 2.54)	0.00929	Adj.R.Squared	-0.00449	**
	Daily.Interpol.	-7.16 (-10.36, -3.95)	2.9e-05	Statistic	10.2188	***
				Deg.Freedom	2105
				P-Value	8.81e-05
	2 Lags
	Rate ~ Tobacco * LM.Cannabis_x_Resin.THC + LM.Cannabis_x_Herb.THC + Resin + Alcohol + Daily.Interpol. + Amphetamines + Cocaine + Income
	Tobacco	-0.04 (-0.06, -0.02)	0.000114	Adj.R.Squared	0.0608	***
	LM.Cannabis_x_Resin.THC	-5.94 (-9.46, -2.41)	0.001416	Statistic	7.4291	**
	Resin	-1.57 (-2.71, -0.43)	0.00809	Deg.Freedom	5,88	**
	Daily.Interpol.	-9.27 (-15.41, -3.14)	0.003923	P-Value	7.47e-06	**
	Tobacco: LM.Cannabis_x_Resin.THC	0.27 (0.13, 0.42)	0.000408			***
		LAnomRt ~ lag(TobRt,1) * lag(pmResin,1) + lag(pmHerb,1) + lag(Resin,1) + lag(AlcRt,1) + lag(pm.Daily.Intpltd,1) + lag(LAmph,1) + lag(LCocc,1) + lag(MHY,1)
		LAnomRt ~ lag(TobRt,2) * lag(pmResin,2) + lag(pmHerb,2) + lag(Resin,2) + lag(AlcRt,2) + lag(pm.Daily.Intpltd,2) + lag(LAmph,2) + lag(LCocc,2) + lag(MHY,2)

## Sheet: ST11 Cat plm
	Parameters			Model Parameters
	Term	Estimate (C.I.)	P-Value	Parameter	Value
	Additive
	Rate ~ Tobacco + LM.Cannabis_x_Resin.THC + Herb + LM.Cannabis_x_Herb.THC_x_Daily.Interpol. + LM.Cannabis_x_Resin.THC_x_Daily.Interpol. + Alcohol + Amphetamines + Cocaine + Income
	LM.Cannabis_x_Herb.THC_x_Daily.Interpol.	-1.26 (-2.18, -0.34)	0.0085	Adj.R.Squared	0.1309	**
	LM.Cannabis_x_Herb.THC: LM.Cannabis_x_Resin.THC_x_Daily.Interpol.	1.41 (0.35, 2.46)	0.0103	Statistic	7.0756	*
	Cocaine	0.18 (0, 0.36)	0.0482	Deg.Freedom	3118	*
				P-Value	0.0002
	Interactive
	Rate ~ Tobacco + LM.Cannabis_x_Resin.THC + Herb + LM.Cannabis_x_Herb.THC_x_Daily.Interpol. + LM.Cannabis_x_Resin.THC_x_Daily.Interpol. + Alcohol + Amphetamines + Cocaine + Income
	Herb	-7.42 (-11.2, -3.64)	0.0002	Adj.R.Squared	0.0491	***
	Resin	-1.83 (-2.24, -1.43)	9.7e-15	Statistic	40.1683	***
	LM.Cannabis_x_Resin.THC_x_Daily.Interpol.	2.09 (1.65, 2.53)	5.88e-16	Deg.Freedom	3118	***
				P-Value	<2.2E-16
	2 Lags
	Rate ~ Tobacco * LM.Cannabis_x_Herb.THC_x_Daily.Interpol. + Herb + LM.Cannabis_x_Resin.THC + Alcohol + LM.Cannabis_x_Resin.THC_x_Daily.Interpol. + Amphetamines + Cocaine + Income
	LM.Cannabis_x_Herb.THC_x_Daily.Interpol.	-5.19 (-7.67, -2.71)	9.2e-05	Adj.R.Squared	0.0885	***
	LM.Cannabis_x_Resin.THC	-5.03 (-8.64, -1.42)	0.0076	Statistic	34.5821	**
	LM.Cannabis_x_Resin.THC_x_Daily.Interpol.	5.88 (3.04, 8.73)	0.0001	Deg.Freedom	4,89	***
	Cocaine	0.37 (0.24, 0.51)	5.72e-07	P-Value	<2.2E-16	***
	LAnomRt ~ lag(TobRt,2) * lag(LpmHerbDailyInt,2) + lag(Herb,2) + lag(pmResin,2) + lag(AlcRt,2) + lag(LpmResinDailyInt,2) + lag(LAmph,2) + lag(LCocc,2) + lag(MHY,2)

## Sheet: ST12 HPE plm
	Parameters			Model Parameters
	Term	Estimate (C.I.)	P-Value	Parameter	Value
	Additive
	Rate ~ Tobacco + Alcohol + LM.Cannabis_x_Resin.THC_x_Daily.Interpol. + LM.Cannabis_x_Resin.THC + LM.Cannabis_x_Herb.THC_x_Daily.Interpol. + Herb + Amphetamines + Cocaine + Income
	Tobacco	0.05 (0.02, 0.07)	0.0013	Adj.R.Squared	0.1602	**
	LM.Cannabis_x_Resin.THC	1.12 (0.85, 1.39)	3.21e-13	Statistic	23.8932	***
	Income	0 (0, 0)	6.01e-05	Deg.Freedom	3118	***
				P-Value	3.71e-12
	Interactive
	Rate ~ Tobacco * LM.Cannabis_x_Resin.THC_x_Daily.Interpol. * LM.Cannabis_x_Resin.THC + LM.Cannabis_x_Herb.THC_x_Daily.Interpol. * Herb + Alcohol + Amphetamines + Cocaine + Income
	Tobacco	0.07 (0.03, 0.1)	0.0003	Adj.R.Squared	0.1578	***
	Income	0 (0, 0)	5.65e-06	Statistic	8.5573	***
	LM.Cannabis_x_Herb.THC_x_Daily.Interpol.: Herb	1 (0.34, 1.66)	0.003712	Deg.Freedom	3118	**
				P-Value	3.45e-05
	2 Lags
	Rate ~ Tobacco * LM.Cannabis_x_Resin.THC_x_Daily.Interpol. * LM.Cannabis_x_Resin.THC + Herb + Alcohol + LM.Cannabis_x_Resin.THC + Amphetamines + Cocaine + Income
	LM.Cannabis_x_Resin.THC	1.19 (0.86, 1.53)	3.67e-10	Adj.R.Squared	0.08993	***
	Cocaine	0.19 (0.1, 0.29)	0.000157	Statistic	31.355	***
				Deg.Freedom	2,91
				P-Value	4.38e-11
	LAnomRt ~ lag(TobRt,2) * lag(LpmResinDailyInt,2) * lag(pmResin,2) + lag(Herb,2) + lag(AlcRt,2) + lag(pmResin,2) + lag(LAmph,2) + lag(LCocc,2) + lag(MHY,2)

[truncated: 1 more sheets: ST13 EV~Group]
